# Supplementary material for: Fabrication and absorption properties based on ZnO nanocomposites adjusted by length–diameter ratio of ZnO nanorods
Source: Royal Society of Chemistry journal article supplement (doi:10.1039/c5ce02498f), 2016-01-01
Supplement: c5ce02498f1.pdf [file c5ce02498f1.pdf]

## Supporting Information

### Fabrication and absorption properties based on ZnO nanocomposites adjusted by length-diameter ratio of ZnO nanorods

Qiong Wu<sup>a</sup>, Yu Si<sup>a</sup>, Ying-Ying Wu<sup>a</sup>, Shan-Wen Wang<sup>a</sup>, Guang-Sheng Wang<sup>a\*</sup>  
and Lei Wang<sup>b\*</sup>

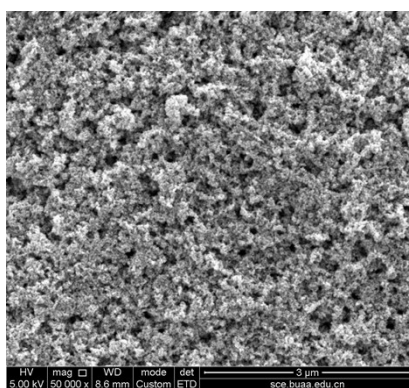

Figure S1. SEM image of ZnO precursors before hydrothermal process.

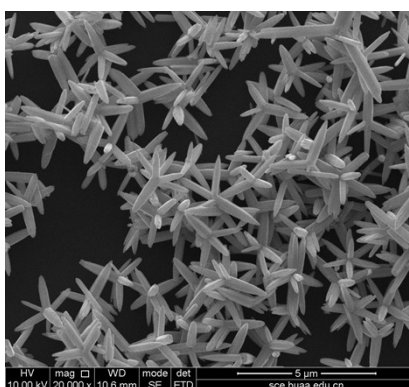

Figure S2. SEM image of ZnO products without CTAB.

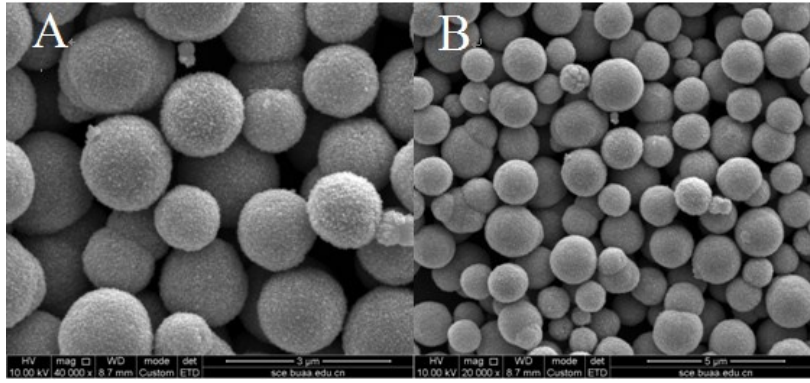

Figure S3. SEM image of ZnO products without HAA.

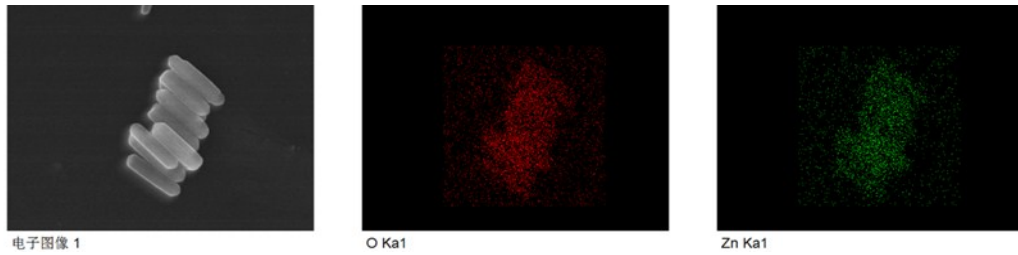

Figure S4. EDS mapping of ZnO nanorods.

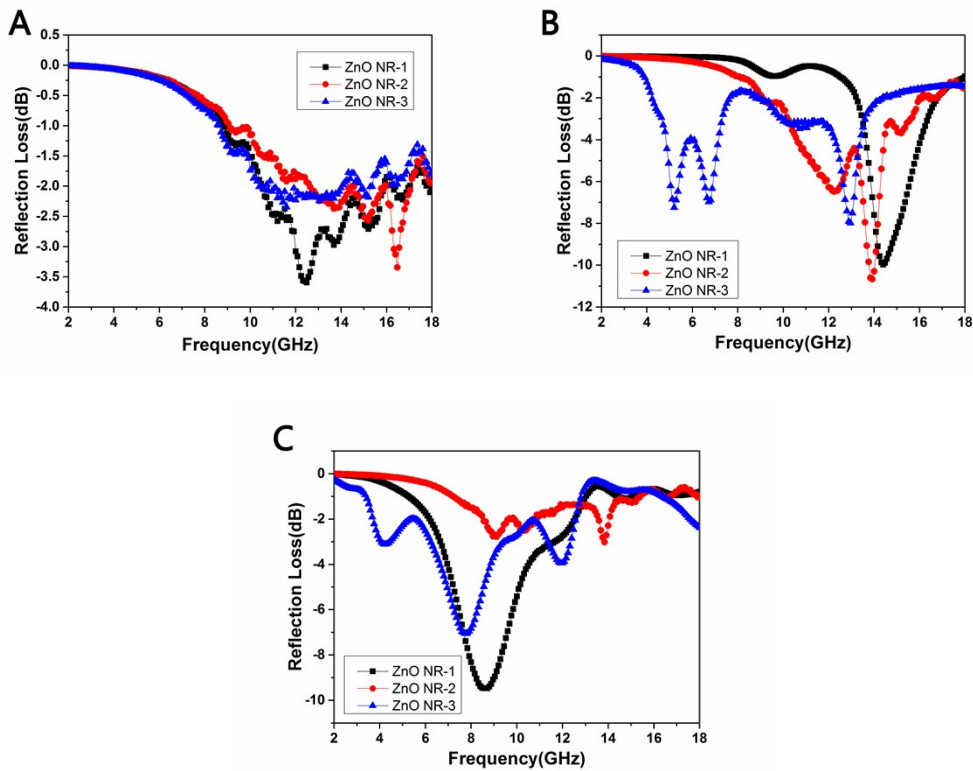

Figure S5. the RLs of the three samples with the same fillers content of (A: 5 wt%; B 10

wt%; C 25 wt%) with the thickness 3 mm.
